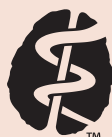

**American Psychiatric Association  
Publishing**

*Editorial Director, Journals*  
Michael D. Roy  
*Production Manager, Journals*  
Wendy Lieberman Taylor  
*Publisher*  
Rebecca D. Rinehart

**American Psychiatric Association  
Department of Continuing  
Medical Education**

*Associate Director, Focus*  
Kristen Moeller  
*Editorial Services Manager*  
Miriam Epstein

We would like to thank Deborah Hales, M.D., for her contributions to the 2015 edition.

*Focus*, a journal of the American Psychiatric Association published by American Psychiatric Association Publishing  
ISSN 1541-4094. Printed in the United States.

Published quarterly. Periodicals postage paid at Arlington, VA, and additional mailing offices. POSTMASTER: Send address changes to *Focus*, Circulation Department, American Psychiatric Association Publishing, 1000 Wilson Blvd., Suite 1825, Arlington, VA 22209-3901.

**Subscriptions**

U.S. APA member \$379, U.S. non-member \$592. For additional subscription options, including international and student rates, contact Customer Service at (703) 907-7300 or (800) 368-5777.

**Officers of the Association**

Renée L. Binder, M.D., President  
Maria A. Oquendo, M.D., President-Elect  
Altha J. Stewart, M.D., Secretary  
Saul Levin, M.D., M.P.A., CEO and Medical Director

**Editorial Offices**

Telephone: (703) 907-8637  
Fax: (703) 907-7849  
Journal Web site: [focus.psychiatryonline.org](http://focus.psychiatryonline.org)  
Focus CME: [psychiatryonline.org/cme](http://psychiatryonline.org/cme)

**Change of Address and Assistance  
With Subscriptions**

Contact Customer Service at (703) 907-7300 or (800) 368-5777 or send an email to [appi@psych.org](mailto:appi@psych.org).

**CME**

Telephone: (703) 907-8637, Fax: (703) 907-7849, Email: [educme@psych.org](mailto:educme@psych.org)

**Online Access**

Call (800) 368-5777 or email [appi@psych.org](mailto:appi@psych.org) for assistance with online access to *Focus* and CME activities.

Copyright © 2015, American Psychiatric Association

# Focus

The Journal of Lifelong Learning in Psychiatry

## Editorial Board

**Editor**

Mark Hyman Rapaport, M.D.  
*Atlanta, Georgia*

**Patient Management Exercise**

Ian A. Cook, M.D.  
*Los Angeles, California*

**Ethics Commentary**

Laura Weiss Roberts, M.D.  
*Palo Alto, California*

**Communication Commentary**

Dorothy E. Stubbe, M.D.  
*New Haven, Connecticut*

**Senior Advisory Board**

Carol A. Bernstein, M.D.  
*New York, New York*  
Kathleen T. Brady, M.D., Ph.D.  
*Charleston, South Carolina*

Peter F. Buckley, M.D.  
*Augusta, Georgia*

Pedro L. Delgado, M.D.

*Little Rock, Arkansas*  
Glen O. Gabbard, M.D.

*Houston, Texas*

Ira M. Lesser, M.D.

*Torrance, California*

Charles F. Reynolds III, M.D.

*Pittsburgh, Pennsylvania*

Pedro Ruiz, M.D.

*Miami, Florida*

Stephen C. Scheiber, M.D.

*Glenview, Illinois*

Daniel K. Winstead, M.D.

*New Orleans, Louisiana*

Joel Yager, M.D.

*Denver, Colorado*

**Editorial Board**

Joseph A. Cheong, M.D.

*Nashville, Tennessee*

Richard Balon, M.D.

*Rochester Hills, Michigan*

Donald M. Hilty, M.D.

*Sacramento, California*

Avram H. Mack, M.D.

*Washington, D.C.*

Vishal Madaan, M.D.

*Charlottesville, Virginia*

Gail H. Manos, M.D.

*Portsmouth, Virginia*

Cheryl F. McCartney, M.D.

*Chapel Hill, North Carolina*

Philip R. Muskin, M.D.

*New York, New York*

Michele T. Pato, M.D.

*Los Angeles, California*

Victor I. Reus, M.D.

*San Francisco, California*

Cynthia W. Santos, M.D.

*Houston, Texas*

Deborah Spitz, M.D.

*Chicago, Illinois*

James W. Thompson, M.D., M.P.H.

*Palm Beach, Florida*

Joyce A. Tinsley, M.D., M.S.

*Farmington, Connecticut*

Sidney Zisook, M.D.

*San Diego, California*

**Associate Editors eFOCUS**

David L. Fogelson, M.D.

*Los Angeles, California*

Robert J. Boland, M.D.

*Providence, Rhode Island*

**FOCUS Self-Assessment Editorial Board**

Robert J. Boland, M.D.

*Providence, Rhode Island*

Annelle B. Primm, M.D., M.P.H.

*Arlington, Virginia*

Arden D. Dingle, M.D.

*Decatur, Georgia*

Laura Fochtmann, M.D.

*Stonybrook, New York*

James W. Jefferson, M.D.

*Madison, Wisconsin*

Vishal Madaan, M.D.

*Charlottesville, Virginia*

Annette M. Matthews, M.D.

*Portland, Oregon*

Lindsay J. Moskowitz, M.D.

*New Hyde Park, New York*

Shawn Sidhu, M.D.

*Albuquerque, New Mexico*

Marcia Verduin, M.D.

*Orlando, Florida*

Randon Welton, M.D.

*Dayton, Ohio*

Eric R. Williams, M.D.

*Columbia, South Carolina*

Please visit the Journal's Web site at [focus.psychiatryonline.org](http://focus.psychiatryonline.org)
