SUMMER 2015 | VOLUME 13 | NUMBER 3

# Focus

The Journal of Lifelong Learning in Psychiatry

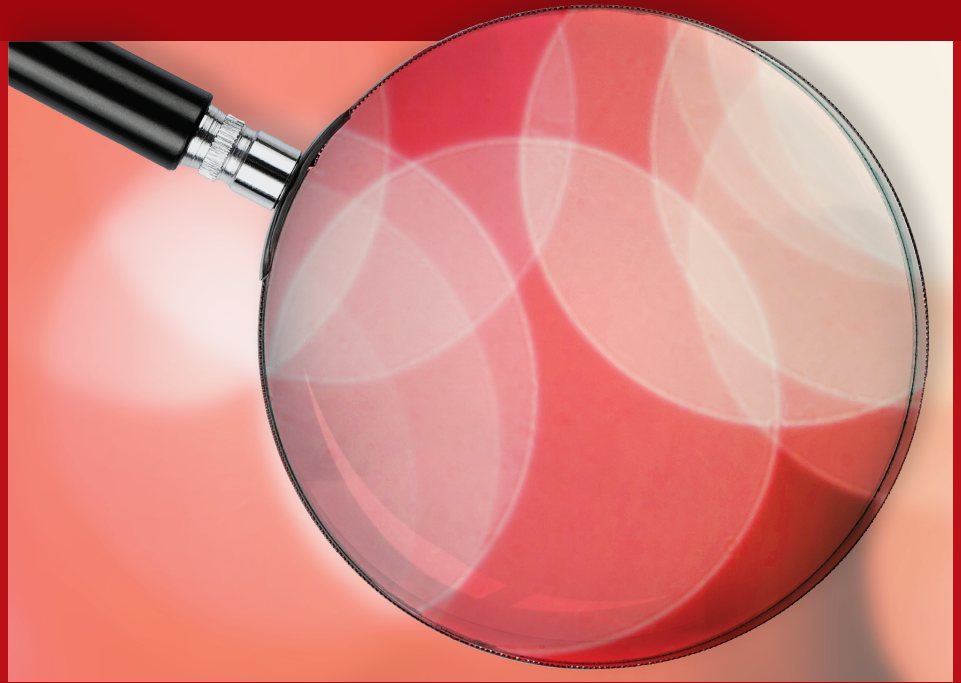

## Substance-Related and Addictive Disorders

Guest Editor: Nora D. Volkow, M.D.

Cannabinoid-Based Drugs: Potential Applications  
in Addiction and Other Mental Disorders

Stimulants: Abuse and Performance Enhancement (or Lack Thereof)

Smoking and Mental Illness: Strategies to Increase  
Screening, Assessment, and Treatment

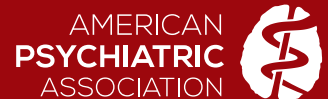

[focus.psychiatryonline.org](http://focus.psychiatryonline.org)
