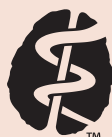

**American Psychiatric Association  
Publishing**

*Editorial Director, Journals*

Michael D. Roy

*Production Manager, Journals*

Wendy Lieberman Taylor

*Publisher*

Rebecca D. Rinehart

**American Psychiatric Association  
Department of Continuing  
Medical Education**

*Associate Director, Focus*

Kristen Moeller

*Editorial Services Manager*

Miriam Epstein

We would like to thank Deborah Hales, M.D., for her contributions to the 2015 edition.

*Focus*, a journal of the American Psychiatric Association published by American Psychiatric Association Publishing  
ISSN 1541-4094. Printed in the United States.

Published quarterly. Periodicals postage paid at Arlington, VA, and additional mailing offices. POSTMASTER: Send address changes to *Focus*, Circulation Department, American Psychiatric Association Publishing, 1000 Wilson Blvd., Suite 1825, Arlington, VA 22209-3901.

**Subscriptions**

U.S. APA member \$379, U.S. non-member \$592. For additional subscription options, including international and student rates, contact Customer Service at (703) 907-7300 or (800) 368-5777.

**Officers of the Association**

Renée L. Binder, M.D., President

Maria A. Oquendo, M.D., President-Elect

Altha J. Stewart, M.D., Secretary

Saul Levin, M.D., M.P.A., CEO and Medical Director

**Editorial Offices**

Telephone: (703) 907-8637

Fax: (703) 907-7849

Journal Web site: [focus.psychiatryonline.org](http://focus.psychiatryonline.org)

Focus CME: [psychiatryonline.org/cme](http://psychiatryonline.org/cme)

**Change of Address and Assistance  
With Subscriptions**

Contact Customer Service at (703) 907-7300 or (800) 368-5777 or send an email to [appi@psych.org](mailto:appi@psych.org).

**CME**

Telephone: (703) 907-8637, Fax: (703)

907-7849, Email: [educme@psych.org](mailto:educme@psych.org)

**Online Access**

Call (800) 368-5777 or email [appi@psych.org](mailto:appi@psych.org) for assistance with online access to *Focus* and CME activities.

Copyright © 2015, American Psychiatric Association

# Focus

The Journal of Lifelong Learning in Psychiatry

## Editorial Board

**Editor**

Mark Hyman Rapaport, M.D.

*Atlanta, Georgia*

**Patient Management Exercise**

Ian A. Cook, M.D.

*Los Angeles, California*

**Ethics Commentary**

Laura Weiss Roberts, M.D.

*Palo Alto, California*

**Communication Commentary**

Dorothy E. Stubbe, M.D.

*New Haven, Connecticut*

**Senior Advisory Board**

Carol A. Bernstein, M.D.

*New York, New York*

Kathleen T. Brady, M.D., Ph.D.

*Charleston, South Carolina*

Peter F. Buckley, M.D.

*Augusta, Georgia*

Pedro L. Delgado, M.D.

*Little Rock, Arkansas*

Glen O. Gabbard, M.D.

*Houston, Texas*

Ira M. Lesser, M.D.

*Torrance, California*

Charles F. Reynolds III, M.D.

*Pittsburgh, Pennsylvania*

Pedro Ruiz, M.D.

*Miami, Florida*

Stephen C. Scheiber, M.D.

*Glenview, Illinois*

Daniel K. Winstead, M.D.

*New Orleans, Louisiana*

Joel Yager, M.D.

*Denver, Colorado*

**Editorial Board**

Joseph A. Cheong, M.D.

*Nashville, Tennessee*

Richard Balon, M.D.

*Rochester Hills, Michigan*

Donald M. Hilty, M.D.

*Sacramento, California*

Avram H. Mack, M.D.

*Washington, D.C.*

Vishal Madaan, M.D.

*Charlottesville, Virginia*

Gail H. Manos, M.D.

*Portsmouth, Virginia*

Cheryl F. McCartney, M.D.

*Chapel Hill, North Carolina*

Philip R. Muskin, M.D.

*New York, New York*

Michele T. Pato, M.D.

*Los Angeles, California*

Victor I. Reus, M.D.

*San Francisco, California*

Cynthia W. Santos, M.D.

*Houston, Texas*

Deborah Spitz, M.D.

*Chicago, Illinois*

James W. Thompson, M.D., M.P.H.

*Palm Beach, Florida*

Joyce A. Tinsley, M.D., M.S.

*Farmington, Connecticut*

Sidney Zisook, M.D.

*San Diego, California*

**Associate Editors eFOCUS**

David L. Fogelson, M.D.

*Los Angeles, California*

Robert J. Boland, M.D.

*Providence, Rhode Island*

**FOCUS Self-Assessment Editorial Board**

Robert J. Boland, M.D.

*Providence, Rhode Island*

Annelle B. Primm, M.D., M.P.H.

*Arlington, Virginia*

Arden D. Dingle, M.D.

*Decatur, Georgia*

Laura Fochtmann, M.D.

*Stonybrook, New York*

James W. Jefferson, M.D.

*Madison, Wisconsin*

Vishal Madaan, M.D.

*Charlottesville, Virginia*

Annette M. Matthews, M.D.

*Portland, Oregon*

Lindsay J. Moskowitz, M.D.

*New Hyde Park, New York*

Shawn Sidhu, M.D.

*Albuquerque, New Mexico*

Marcia Verduin, M.D.

*Orlando, Florida*

Randon Welton, M.D.

*Dayton, Ohio*

Eric R. Williams, M.D.

*Columbia, South Carolina*

Please visit the Journal's Web site at [focus.psychiatryonline.org](http://focus.psychiatryonline.org)

# Focus

The Journal of Lifelong Learning in Psychiatry

## EDUCATIONAL OBJECTIVES

FOCUS, the APA continuing medical education journal, is designed as a personal study resource to help practicing psychiatrists keep abreast of significant advances in the field, with particular attention to clinical practice.

Participants review current knowledge, recognize gaps in learning, and increase their understanding of an important topic in the field of psychiatry.

Participants prepare for an annual self-assessment designed to aid the physician in addressing areas where more study is needed to enhance management of patients.

## TO EARN CME CREDIT

Each issue, prepared by distinguished faculty who are recognized leaders in their fields, incorporates a CME component. To earn CME credit for FOCUS, subscribers should read through the material presented in each issue. After reading the material, complete the CME Quiz with a passing score of 60% and submit the evaluation and study hours to APA; or complete the Quiz and evaluation online at [focus.psychiatryonline.org](http://focus.psychiatryonline.org).

## ACCREDITATION AND DESIGNATION

The American Psychiatric Association is accredited by the Accreditation Council for Continuing Medical Education to provide continuing medical education for physicians. The APA designates this Journal-Based CME activity for a maximum of 5 AMA PRA Category 1 credits™. Physicians should only claim credit commensurate with the extent of their participation in the activity.

Neither the American Psychiatric Association nor American Psychiatric Association Publishing holds itself responsible for statements made in its publications by contributors. Unless so stated, material in FOCUS does not reflect the endorsement, official attitude, or position of the American Psychiatric Association, American Psychiatric Association Publishing, or the Journal's Editorial Board.

Material published in the journals of the American Psychiatric Association is protected by copyright and all rights are reserved. Material may not be reproduced in any form or by any means without written permission from the copyright owner. For permission to reproduce material from American Psychiatric Association journals, please visit <http://www.appi.org/CustomerService/Pages/Permissions.aspx> for more information. Permission can also be secured through the Copyright Clearance Center ([www.copyright.com](http://www.copyright.com)). For bulk reprints, please contact Cecilia Stoute at 703-907-8547; e-mail: [cstoute@psych.org](mailto:cstoute@psych.org).

This consent does not extend to other kinds of copying, such as copying for general distribution, for advertising or promotional purposes, for creating new collective works, or for resale. Permission need not be obtained for photocopying isolated articles for nonprofit classroom or library reserve use; all fees associated with such permission are waived.

"Lifelong Learning in Psychiatry" is an evolving series of educational initiatives developed by the American Psychiatric Association to meet the changing needs of psychiatrists for the 21st century.

FOCUS, the APA continuing education journal, is designed for practicing psychiatrists to keep abreast of significant advances in the field, while developing self-directed lifelong learning skills. The goal of FOCUS is the lively interactive dissemination of up-to-date information for practicing psychiatrists, facilitating lifelong study skills and critical self-assessment in order to improve patient care.

The American Board of Psychiatry and Neurology has reviewed FOCUS: *The Journal of Lifelong Learning in Psychiatry* and the FOCUS Self-Assessment Examination and has approved this program as part of a comprehensive lifelong learning and self-assessment program, which is mandated by the American Board of Medical Specialties as a necessary component of maintenance of certification.

## Royal College of Physicians and Surgeons of Canada

The Focus Self-Assessment Program (Vol. 12) is an accredited self-assessment program (Section 3) as defined by the Maintenance of Certification Program of The Royal College of Physicians and Surgeons of Canada, and was approved by the Canadian Psychiatric Association on Oct. 1, 2014. This program expires Sept. 30, 2017. Remember to visit MAINPORT (<https://www.mainport.org/mainport/>) to record your learning and outcomes. You may claim a maximum of 24 hours (credits are automatically calculated).

## American Academy of Physician Assistants

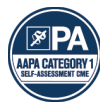

The FOCUS Self-Assessment CME Program has been reviewed and is approved for a maximum of 24 AAPA Category 1 Self-Assessment CME credits by the Physician Assistant Review Panel. Approval is valid until 10/31/2017. Physician assistants should claim only the credit commensurate with the extent of their participation in the activity. This program was planned in accordance with AAPA's CME Standards.

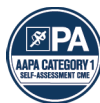

The Performance Improvement CME programs marked on the next page with an asterisk have been reviewed and are approved for a maximum of 20.00 AAPA Category 1 PI-CME credits by the Physician Assistant Review Panel. Total number of approved credits for each stage of this PI-CME program are as follows: Stage A: 5.0 AAPA Category 1 PI-CME credits; Stage B: 5.0 AAPA Category 1 PI-CME credits; Stage C: 5.0 AAPA Category 1 PI-CME credits. Bonus for completion of all three stages: 5.0 AAPA Category 1 PI-CME credits. Approval is valid until dates listed below. Physician Assistants should claim only the credit commensurate with the extent of their participation in the activity. This program was planned in accordance with AAPA's CME Standards.

Contact American Psychiatric Association, Department of CME, [educme@psych.org](mailto:educme@psych.org) for information regarding revised end dates and updates to the clinical modules. All Performance in Practice modules published in FOCUS are available to all FOCUS subscribers.

**Disclosure Listing for FOCUS, eFOCUS and FOCUS Self-Assessment Editors, Associate Editors, and Editorial Boards:**

Kathleen T. Brady, M.D., Consultant: Ovation, Alkermes, Teva. Peter Buckley, M.D., Ph.D., Co-investigator: Ameritox, Auspex Pharmaceuticals, Alkermes, Posit Science Corporation, NIMH/ UT Southwestern Medical Center, NIMH/ U Maryland. Ian A. Cook, M.D., Research support: NeoSync, NIH, AHRQ/APA; Advisor/Consultant: NeuroSigma, NIH (ITVA member), VA (DSM member); Intellectual Property: assigned to UCLA and licensed to NeuroSigma, Inc.; Employee/Management/stock options: NeuroSigma, Inc. Arden Dingle, M.D., Advisory Board: Amerigroup Behavioral Health Advisory Committee. James W. Jefferson, M.D., Lecture Honoraria: GlaxoSmithKline, Purdue, Sunovion; Stock Shareholder: BMS, GlaxoSmithKline, SciClone; Principal: Healthcare Technology Systems, Inc. Vishal Madaan, M.D., M.B.B.S., Research Support: Otsuka, Merck, Lilly, Pfizer, Forest, Shire, Sunovion. Victor L. Reus, M.D., Stock Shareholder: Exelixis. Charles F. Reynolds, M.D., Pharmaceutical Supplies for NIH sponsored clinical trials from Bristol-Myers Squibb, Pfizer. Laura Weiss Roberts, M.D., M.A., Owner, Investigator: Terra Nova Learning Systems. Cynthia W. Santos, M.D., Research Support: Curemark. Joyce A. Tinsley, M.D., Employee (spouse): Sanofi. Marcia L. Verduin, M.D., Scientific Advisory Board: Lake Nona Life Project, sponsored by Lake Nona Institute and Johnson & Johnson.

**Editors and Members of the Editorial Boards of FOCUS and the FOCUS Self-Assessment listed below report no disclosures:**

Richard Balon, M.D., Carol A. Bernstein, M.D., Robert J. Boland, M.D., Josepha A. Cheong, M.D., Pedro Delgado, M.D., David L. Fogelson, M.D., Deborah J. Hales, M.D., Laura Fochtman, M.D., Glen O. Gabbard, M.D., Donald M. Hilty, M.D., Ira M. Lesser, M.D., Avram Mack, M.D., Gail H. Manos, M.D., Annette M. Matthews, M.D., Cheryl F. McCartney, M.D., Lindsay J. Moskowitz, M.D., Philip R. Muskin, M.D., Michele T. Pato, M.D., Annelie B. Primm, M.D., M.P.H., Mark H. Rapaport, M.D., Pedro Ruiz, M.D., Stephen C. Scheiber, M.D., Shawn Sidhu, M.D., Deborah Spitz, M.D., Dorothy Stubbe, M.D., James W. Thompson, M.D., M.P.H., Eric R. Williams, M.D., Daniel K. Winstead, M.D., Joel Yager, M.D., Sidney Zisook, M.D.

**Improvement in Medical Practice/Performance in Practice (PIP) Clinical Modules Published in FOCUS (MOC Part 4 and PI CME)**

The American Board of Psychiatry and Neurology has approved the following *FOCUS* Performance in Practice clinical chart review tools of the American Psychiatric Association as Maintenance of Certification, Part 4, Clinical Modules.

|                                                                                                                                                           |                       |
|-----------------------------------------------------------------------------------------------------------------------------------------------------------|-----------------------|
| *Performance in Practice: Physician Assessment Module for the Screening of Adults with Substance Use Disorder                                             | Feb 2011–Feb 2017     |
| *Performance in Practice: Physician Assessment Module for the Assessment and Treatment of Adults with Substance Use Disorder                              | Feb 2011–Feb 2017     |
| *Performance in Practice: Physician Assessment Tool for the Care of Adults with Schizophrenia                                                             | June 2012–June 2018   |
| *Performance in Practice: Physician Practice Assessment Tool for the Assessment and Treatment of Adults at Risk for Suicide and Suicide-Related Behaviors | March 2011–March 2017 |
| *Performance in Practice: Clinical Module for the Care of Patients With Major Depressive Disorder                                                         | July 2012–July 2018   |
| *Performance in Practice: Clinical Module for the Care of Patients with Posttraumatic Stress Disorder                                                     | Aug 2013–Aug 2016     |
| Improvement in Medical Practice (PIP): Physician Practice Assessment Tools for Screening of Adults with Substance Use Disorder                            | June 2015–June 2018   |
| Improvement in Medical Practice (PIP): Physician Practice Assessment Tool for the Assessment and Treatment of Adults with Substance Use Disorder          | June 2015–June 2018   |
